# Supplementary material for: A gene signature for gold nanoparticle-exposed human cell lines
Source: Royal Society of Chemistry journal article supplement (doi:10.1039/c4tx00181h), 2014-12-24
Supplement: c4tx00181h1.pdf [file c4tx00181h1.pdf]

Supplemental Table 1. Sequences of RT-PCR oligonucleotide primers and probes.

| <b>Gene</b>    | <b>probe</b> | <b>primer</b>                                              |
|----------------|--------------|------------------------------------------------------------|
| <i>TSC22D3</i> | #68          | Left: tggaggccatagacaacaag<br>Right: ttctctccaccagctctcg   |
| <i>TRIB3</i>   | #67          | Left: gtcttcgctgaccgtgaga<br>Right: cagtcagcacgcaggagtc    |
| <i>PCK2</i>    | #61          | Left: ccacctggtgttactgtgacc<br>Right: aatcgagagttgggatgtgc |
| <i>DDIT4</i>   | #69          | Left: ctggacagcagcaacagtg<br>Right: acacccatccaggttaagc    |
| <i>TBP</i>     | #51          | Left: cccatgactcccatgacc<br>Right: ttacaaccaagattcactgtgg  |

Figure S1

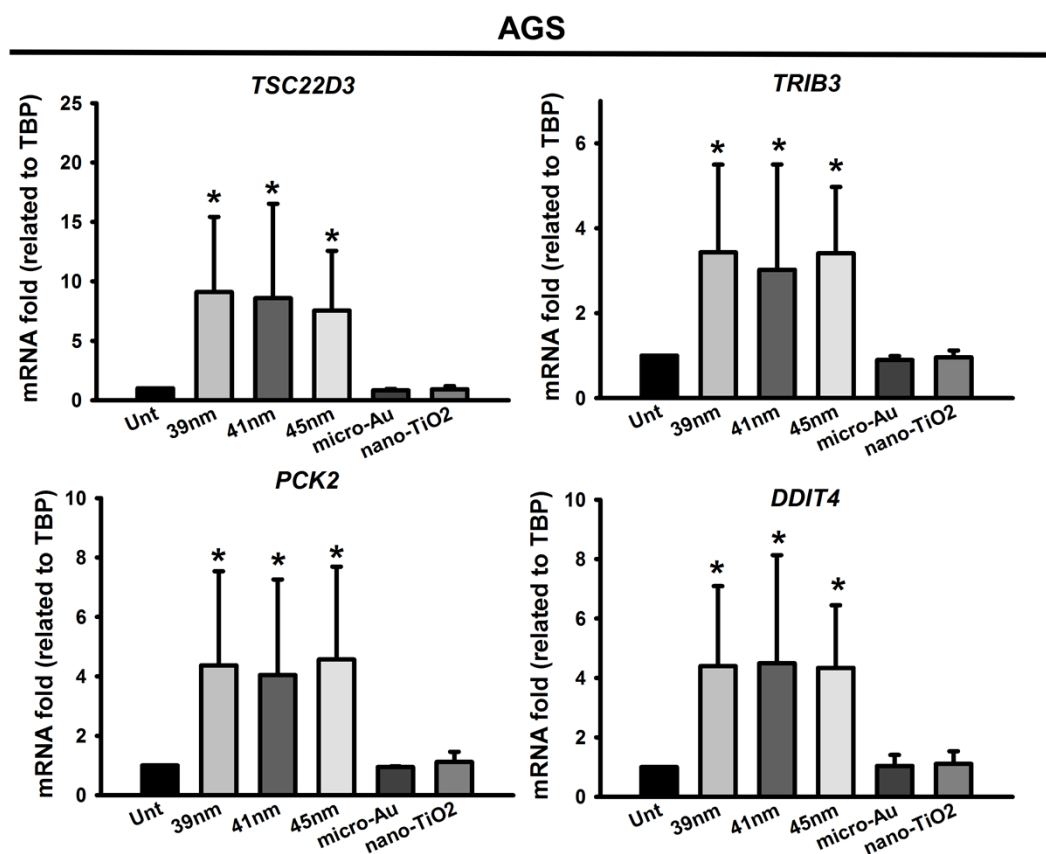

Figure S1. qPCR of *TSC22D3*, *TRIB3*, *PCK2* and *DDIT4* in AGS cells. AGS cells were exposed to 360 ng/ml of 39-, 41-, or 45-nm AuNPs, micro-Au, or nano-TiO<sub>2</sub> for 24 h, and then the mRNA levels of these four genes were determined by qPCR.

\* $P < 0.05$ .

Figure S2

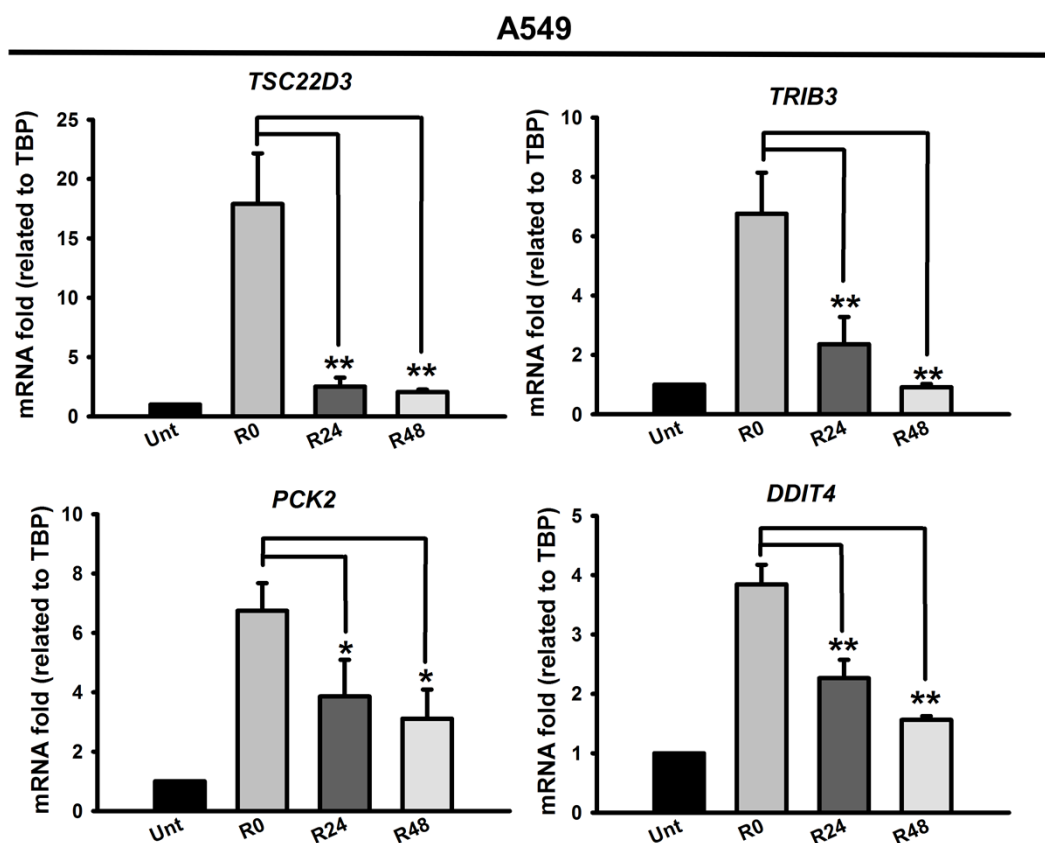

Figure S2. The induction of *TSC22D3*, *TRIB3*, *PCK2* and *DDIT4* expression was dependent on the existence of AuNPs. A549 cells were exposed to 360 ng/ml of 41-nm AuNPs for 24 h, and then the AuNP-contained medium was removed and the cells were washed by PBS twice. The cells were then continually in fresh medium for another 24 and 48 h. mRNA levels of these four genes were determined by qPCR at indicated time periods. \* $P < 0.05$ ; and \*\* $P < 0.01$ .
